# Supplementary material for: Modeling effects of H2S on electron competition among nitrogen oxide reduction and N2O accumulation during denitrification
Source: Royal Society of Chemistry journal article supplement (doi:10.1039/c8ew00873f), 2019-01-01
Supplement: c8ew00873f1.pdf [file c8ew00873f1.pdf]

## Supporting Information

### Modeling Effects of H<sub>2</sub>S on Electron Competition among Nitrogen Oxides Reduction and N<sub>2</sub>O Accumulation during Denitrification

Yuting Pan<sup>a,1</sup>, Yiwen Liu<sup>b,1</sup>, Dongbo Wang<sup>c,\*</sup>, Bing-Jie Ni<sup>b,\*</sup>

<sup>a</sup> Department of Environmental Science and Engineering, College of Architecture and Environment, Sichuan University, Chengdu, Sichuan 610065, China

<sup>b</sup> Centre for Technology in Water and Wastewater, School of Civil and Environmental Engineering, University of Technology Sydney, Sydney, NSW 2007, Australia

<sup>c</sup> Key Laboratory of Environmental Biology and Pollution Control, College of Environmental Science and Engineering, Hunan University, Changsha, 410082, China

<sup>1</sup> Yuting Pan and Yiwen Liu contributed equally to the work.

**\*Corresponding authors:**

Dr. Bing-Jie Ni, Tel.: +61 295147401; E-mail: bingjieni@gmail.com

Dr. Dongbo Wang, Tel.: +86 7 31 88823967; E-mail: dongbowang@hnu.edu.cn

**Table S1.** Model components

| <b>Variable</b> | <b>Description</b>                              | <b>Unit</b>                                 |
|-----------------|-------------------------------------------------|---------------------------------------------|
| $S_{H_2S}$      | H <sub>2</sub> S concentration                  | (mg H <sub>2</sub> S/L as H <sub>2</sub> S) |
| $S_{NO_3}$      | Nitrate concentration                           | (mg N/L as NO <sub>3</sub> <sup>-</sup> )   |
| $S_{NO_2}$      | Nitrite concentration                           | (mg N/L as NO <sub>2</sub> <sup>-</sup> )   |
| $S_{N_2O}$      | Nitrous oxide concentration                     | (mg N/L as N <sub>2</sub> O)                |
| $S_{N_2}$       | Nitrogen gas concentration                      | (mg N/L as N <sub>2</sub> )                 |
| $S_S$           | COD concentration                               | (mg COD/L)                                  |
| $S_{Mred}$      | Reduced form of electron carrier concentration  | (mmol $Mred$ /(mmol biomass))               |
| $S_{Mox}$       | Oxidized form of electron carrier concentration | (mmol $Mred$ /(mmol biomass))               |
| $X$             | Active heterotrophic biomass concentration      | (mg COD/L)                                  |

**Table S2.** Kinetic and stoichiometric parameters of the developed model

| Parameter       | Definition                                                                                      | Value        | Source    |
|-----------------|-------------------------------------------------------------------------------------------------|--------------|-----------|
| $K_{NO2}^{H2S}$ | H <sub>2</sub> S inhibition constant for nitrite reduction, R3 (mg H <sub>2</sub> S/L)          | 1.56±0.11    | Estimated |
| $K_{N2O}^{H2S}$ | H <sub>2</sub> S inhibition constant for N <sub>2</sub> O reduction, R4 (mg H <sub>2</sub> S/L) | 0.088 ±0.009 | Estimated |
| $K_{NO3}^{HB}$  | Affinity constant for nitrate-nitrogen (mg N/L)                                                 | 0.252        | (1)       |
| $K_{NO2}^{HB}$  | Affinity constant for nitrite-nitrogen (mg N/L)                                                 | 0.0574       | (1)       |
| $K_{N2O}^{HB}$  | Affinity constant for nitrous oxide-nitrogen (mg N/L)                                           | 0.07         | (2)       |
| $K_S$           | Affinity constant for Ss (mg COD/L)                                                             | 1.6          | (1)       |
| $r_{COD,max}$   | Maximum carbon source oxidation rate (mg COD/mg biomass COD *hour)                              | 0.24         | (2)       |
| $r_{NO3,max}$   | Maximum nitrate reduction rate (mg N/mg biomass COD *hour)                                      | 0.0277       | (2)       |
| $r_{NO2,max}$   | Maximum nitrite reduction rate (mg N/mg biomass COD *hour)                                      | 0.0364       | (2)       |
| $r_{N2O,max}$   | Maximum nitrous oxide reaction rate ( mg N/mg biomass COD *hour)                                | 0.283        | (2)       |
| $K_{Mox}$       | Affinity constant for S <sub>Mox</sub> , R1 mmol/( mmol biomass)                                | 0.0001       | (2)       |
| $K_{Mred,1}$    | Affinity constant for S <sub>Mred</sub> , R2 mmol/( mmol biomass)                               | 0.0046       | (2)       |
| $K_{Mred,2}$    | Affinity constant for S <sub>Mred</sub> , R3 mmol/( mmol biomass)                               | 0.00040      | (2)       |
| $K_{Mred,3}$    | Affinity constant for S <sub>Mred</sub> , R5 mmol/( mmol biomass)                               | 0.0032       | (2)       |
| $Y_H$           | Heterotrophic yield                                                                             | 0.5          | (3)       |
| $C_{tot}$       | Total electron carrier concentration mmol/mmol biomass                                          | 0.01         | (2)       |

## References

- (1) Henze, M.; Gujer, W.; Mino, T.; van Loosdrecht, M. C. M. Activated sludge models ASM1, ASM2, ASM2d, and ASM3. In IWA Scientific and Technical Report No. 9; IWA Publishing: London, U.K., 2000.
- (2) Pan, Y., Ni, B. J., Lu, H., Chandran, K., Richardson, D., & Yuan, Z. Evaluating two concepts for the modelling of intermediates accumulation during biological denitrification in wastewater treatment. *Water research*, 2015, 71, 21-31.
- (3) Pan, Y.; Ni, B.-J.; Yuan, Z., Modeling electron competition among nitrogen oxides reduction and N<sub>2</sub>O accumulation in denitrification. *Environ. Sci. Technol.* 2013, 47, (19), 11083-11091.
